# Supplementary material
Source: Research Square preprint supplement (doi:10.21203/rs.3.rs-10389959/v1)
Supplement: Supplementary file 1 [file 1026442423f3329e2f5769ed.docx]

**Supplementary Table S1 Food items included in the nutrient-to-price informed practical basket**

**Scenario**: Nutrient-to-price informed practical basket

| **Food group** | **Representative selected price (THB/100 g edible)** | **Selected food items** | **Selection rationale** | **Exclusions / handling notes** |
| --- | --- | --- | --- | --- |
| Rice & starch | 3.34 | Kanom jeen (fermented rice noodles); white rice; sticky rice; purple sweet potato; pumpkin | Lower-cost staple sources that support energy/carbohydrate affordability while retaining variety within the group. | No condiment-like or identity-uncertain items included. |
| Protein foods | 7.68 | Coagulated chicken blood; boiled chicken; chicken breast; Nile tilapia; egg; firm tofu | Lower-cost and/or nutrient-efficient protein sources selected from animal and plant options. | Blood product retained in the practical basket because it is commonly consumed and contributed to lower-cost protein and iron sources. |
| Vegetables | 4.00 | Chinese cabbage; Chinese mustard greens; carrot; cabbage; winter melon | Low-cost vegetables with favorable nutrient-to-price profiles for fiber and micronutrients. | Pla ra and other condiment-like items not considered as vegetable/protein basket items. |
| Fruits | 6.69 | Guava; Nam-wa banana; sapodilla; pineapple; mandarin/tangerine | Lower-cost fruits with favorable vitamin C/fiber-to-price contribution and routine household relevance. | Unverified translated/identity items excluded. |
| Milk & dairy products | 5.52 | Plain UHT milk | Plain milk retained as the practical dairy source. | Sweetened condensed milk excluded as a milk source because it is primarily a sweetened product. |

Note: This basket was modelled for cost comparison and should not be interpreted as a prescribed meal plan or a complete nutrient adequacy assessment.
